# Supplementary material for: The effects of alpha lipoic acid on muscle strength recovery after a single and a short-term chronic supplementation - a study in healthy well-trained individuals after intensive resistance and endurance training
Source: Springer Nature journal article supplement (doi:10.1186/s12970-020-00389-y), 2020-01-03
Supplement: MOESM1 [file 18646480]

1 **Table 3A:** ALA-group individual change of 1RM back squat, absolute and relative

| Subjects | 1RM back squat ALA |         | Baseline | relative change |
|----------|--------------------|---------|----------|-----------------|
|          | T0                 | T2(+7d) | T0       | T2(+7d)         |
| P1       | 110                | 115     | 1,00     | 1,045           |
| P2       | 145                | 140     | 1,00     | 0,966           |
| P3       | 105                | 105     | 1,00     | 1,000           |
| P4       | 135                | 125     | 1,00     | 0,926           |
| P5       | 155                | 150     | 1,00     | 0,968           |
| P6       | 200                | 200     | 1,00     | 1,000           |
| P7       | 170                | 175     | 1,00     | 1,029           |
| P8       | 110                | 115     | 1,00     | 1,045           |
| P9       | 130                | 130     | 1,00     | 1,000           |
| P10      | 140                | 135     | 1,00     | 0,964           |
| P11      | 95                 | 95      | 1,00     | 1,000           |
| P12      | 110                | 110     | 1,00     | 1,000           |
| P13      | 105                | 110     | 1,00     | 1,048           |
| P14      | 105                | 110     | 1,00     | 1,048           |
| P15      | 105                | 110     | 1,00     | 1,048           |
| P16      | 130                | 135     | 1,00     | 1,038           |
| P17      | 140                | 150     | 1,00     | 1,071           |
| Mean     | 128,82             | 130,00  | 1,00     | 1,012           |
| SD       | 27,09              | 26,35   | 0,00     | 0,038           |

3 **Table 3B:** PL-group individual change of 1RM BS, absolute and relative

| Subjects | 1RM back squat PL |         | Baseline | relative change |
|----------|-------------------|---------|----------|-----------------|
|          | T0                | T2(+7d) | T0       | T2(+7d)         |
| P1       | 115               | 115     | 1,00     | 1,000           |
| P2       | 135               | 130     | 1,00     | 0,963           |
| P3       | 100               | 100     | 1,00     | 1,000           |
| P4       | 130               | 130     | 1,00     | 1,000           |
| P5       | 150               | 150     | 1,00     | 1,000           |
| P6       | 210               | 195     | 1,00     | 0,929           |
| P7       | 185               | 175     | 1,00     | 0,946           |
| P8       | 100               | 105     | 1,00     | 1,050           |
| P9       | 130               | 130     | 1,00     | 1,000           |
| P10      | 140               | 140     | 1,00     | 1,000           |
| P11      | 90                | 90      | 1,00     | 1,000           |
| P12      | 105               | 105     | 1,00     | 1,000           |
| P13      | 115               | 105     | 1,00     | 0,913           |
| P14      | 105               | 105     | 1,00     | 1,000           |
| P15      | 110               | 100     | 1,00     | 0,909           |
| P16      | 120               | 125     | 1,00     | 1,042           |
| P17      | 140               | 135     | 1,00     | 0,964           |
| Mean     | 128,24            | 125,59  | 1,00     | 0,983           |
| SD       | 30,29             | 27,22   | 0,00     | 0,039           |

2

4

5

Table 4. All results.

|                                    | Group | T0               | T1               | T2               | Time effect (T0/T1) | Time effect (T0/T2) | Time*group effect (T0/T1) | Time*group effect(T0/T2) | effect size T7d |
|------------------------------------|-------|------------------|------------------|------------------|---------------------|---------------------|---------------------------|--------------------------|-----------------|
| <b>1RM BS (in kg) n=17</b>         | ALA   | 128.8 (SD 27.9)  | 125.9 (SD 29.3)  | 130.0 (SD 27.2)  | .053                | .320                | .992                      | .028#                    | .164            |
|                                    | PL    | 128.2 (SD 30.3)  | 125.3 (SD 28.0)  | 125.6 (SD 27.2)  | .051                | .032*               | .992                      | .028#                    | .164            |
| <b>Myoglobin (in ng/ml) n=16</b>   | ALA   | 35.4 (SD 9.1)    | 51.0 (SD 32.9)   | 50.5 (SD 30.3)   | .045*               | .059                | .581                      | .130                     | .467            |
|                                    | PL    | 33.8 (SD 9.4)    | 53.2 (SD 32.9)   | 71.1 (SD 52.4)   | .002*               | .008*               | .581                      | .130                     | .467            |
| <b>Creatinkinase (in U/L) n=14</b> | ALA   | 290.6 (SD 232.1) | 519.0 (SD 436.5) | 464.1 (SD 250.3) | .014*               | .426                | .119                      | .136                     | .212            |
|                                    | PL    | 217.1 (SD 146.1) | 597.0 (SD 422.5) | 534.6 (SD 392.6) | .000*               | .005*               | .119                      | .136                     | .212            |
| <b>IL6 (in pg/ml) n=16</b>         | ALA   | 5.1 (SD 4.7)     | 2.7 (SD 0.6)     | 7.8 (SD 10.4)    | .092                | .249                | .795                      | .107                     | .587            |
|                                    | PL    | 6.0 (SD 6.1)     | 2.8 (SD 1.0)     | 16.8 (SD 18.1)   | .050                | .005*               | .795                      | .107                     | .587            |
| <b>IL10 (in pg/ml) n=17</b>        | ALA   | 8.5 (SD 9.3)     | 3.5 (SD 2.2)     | 10.2 (SD 14.5)   | .136                | .554                | .479                      | .959                     | .428            |
|                                    | PL    | 7.2 (SD 8.5)     | 3.4 (SD 1.3)     | 18.6 (SD 23.0)   | .289                | .035*               | .479                      | .959                     | .428            |
| <b>HDL (in mg/dl) n=16</b>         | ALA   | 50.0 (SD 7.6)    | ---              | 47.2 (SD 7.1)    | ---                 | .077                | ---                       | .270                     | .041            |
|                                    | PL    | 49.4 (SD7.3)     | ---              | 50.3 (SD 7.9)    | ---                 | .326                | ---                       | .270                     | .041            |
| <b>LDL (mg/dl) n=17</b>            | ALA   | 104.9 (SD 26.0)  | ---              | 100.9 (SD 26.4)  | ---                 | .246                | ---                       | .730                     | .063            |
|                                    | PL    | 107.2 (SD 20.3)  | ---              | 102.4 (SD 20.9)  | ---                 | .266                | ---                       | .730                     | .063            |
| <b>oxLDL (in U/L) n=16</b>         | ALA   | 65.9 (SD 21.3)   | ---              | 54.0 (SD36.5)    | ---                 | .339                | ---                       | .270                     | .083            |
|                                    | PL    | 69.3 (SD 20.2)   | ---              | 49.8 (SD 61.4)   | ---                 | .074                | ---                       | .270                     | .083            |

Time effects were marked with \*; Time x group effects were marked with #.

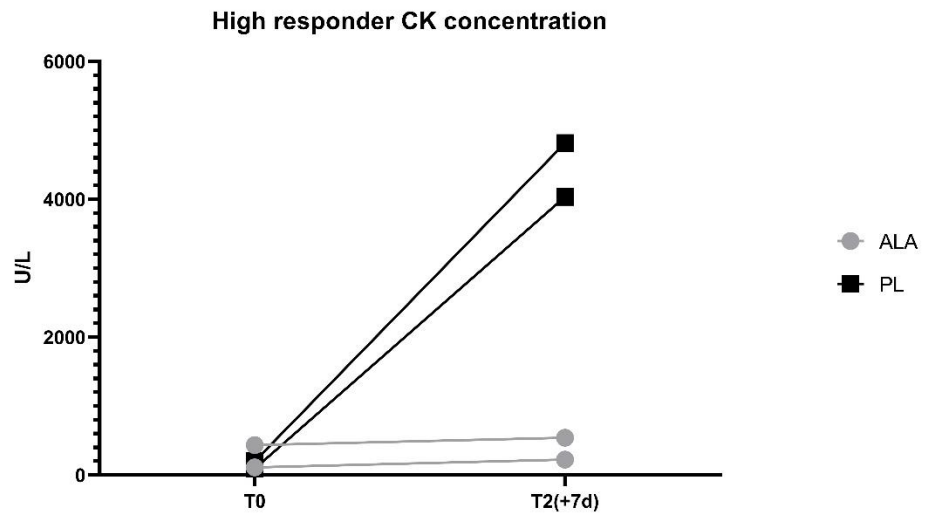

Figure 4 A2 two individual high responder CK concentration
